# Supplementary material
Source: PubMed Central journal article supplement (PMC3545096)
Supplement: NIHMS423151-supplement-Supp_FigureS1-S4_TableS1-S2.pdf [file NIHMS423151-supplement-Supp_FigureS1-S4_TableS1-S2.pdf]

## Supplemental materials

### Supplemental figure legends

#### **Figure S1. Secretion assay of strains expressing the YopD-Bla reporter.**

Plasmids carrying YopD-Bla were transformed into WT and mutant *Y. pestis* strains. Secretion assays were performed to induce expression of the TTSS, and secreted proteins (S) were separated from cells (P) by centrifugation, followed by TCA precipitation and immunoblotting. Antibodies to YopK, YopE, YopM, and YopH show expressed and secreted late Yops. YscD (a structural bacterial protein) is a fractionation control. Bla and YopD antibodies recognize the YopD-Bla reporter as well as the native proteins. Note that secreted full-length Yops (→) show degradation products (\*), as the Pla protease is present.

**Figure S2. Characterizing middle Yop reporters.** *Y. pestis* strains carrying either the YopB-Bla or YopD-Bla reporter as well as arabinose inducible YopJ-GSK were used to infect CHO cells at an MOI of 10 in the presence or absence of arabinose. After 3 hours, cells were lysed and analyzed by SDS-PAGE.  $\beta$ -lactamase (Bla) antibody shows the expression of each reporter fusion and actin probed as a loading control. The arrowhead (→) indicates Bla and GSK reporters while injection of the YopJ-Gsk reporter is shown by a check (✓).

**Figure S3. Secretion assay of strains expressing the YopK point mutants and YopD-Bla reporter.** WT and mutant *Y. pestis* strains expressing YopK or YopK point mutants as well as the YopD-Bla reporter were induced to secrete with low calcium and temperature shift to 37°C. Secreted proteins (S) were separated from cells (P) by centrifugation, followed by TCA precipitation and immunoblotting. Antibody raised against YopK shows expression of native YopK as well as each point mutant derivative. YscD (a structural bacterial protein) is a fractionation control. Note that secreted full-length Yops (➔) show degradation products (\*), as the Pla protease is present.

**Figure S4. Secretion assay of strains expressing the YopK point mutants and YopB-Bla reporter.** WT and mutant *Y. pestis* strains expressing YopK or YopK point mutants as well as the YopB-Bla reporter were induced to secrete with low calcium and temperature shift to 37°C. Secreted proteins (S) were separated from cells (P) by centrifugation, followed by TCA precipitation and immunoblotting. Antibody raised against YopK shows expression of native YopK as well as each point mutant derivative. YscD (a structural bacterial protein) is a fractionation control. Note that secreted full-length Yops (➔) show degradation products (\*), as the Pla protease is present.



**Figure S2.**

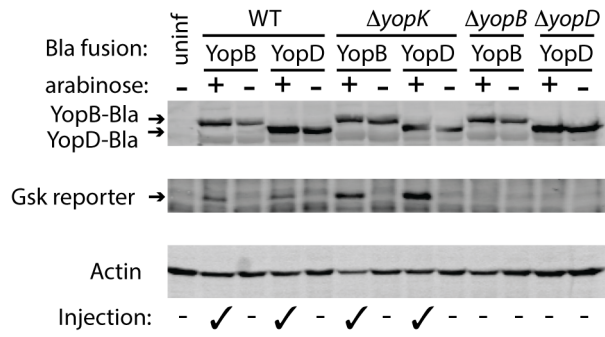

**Figure S3.**

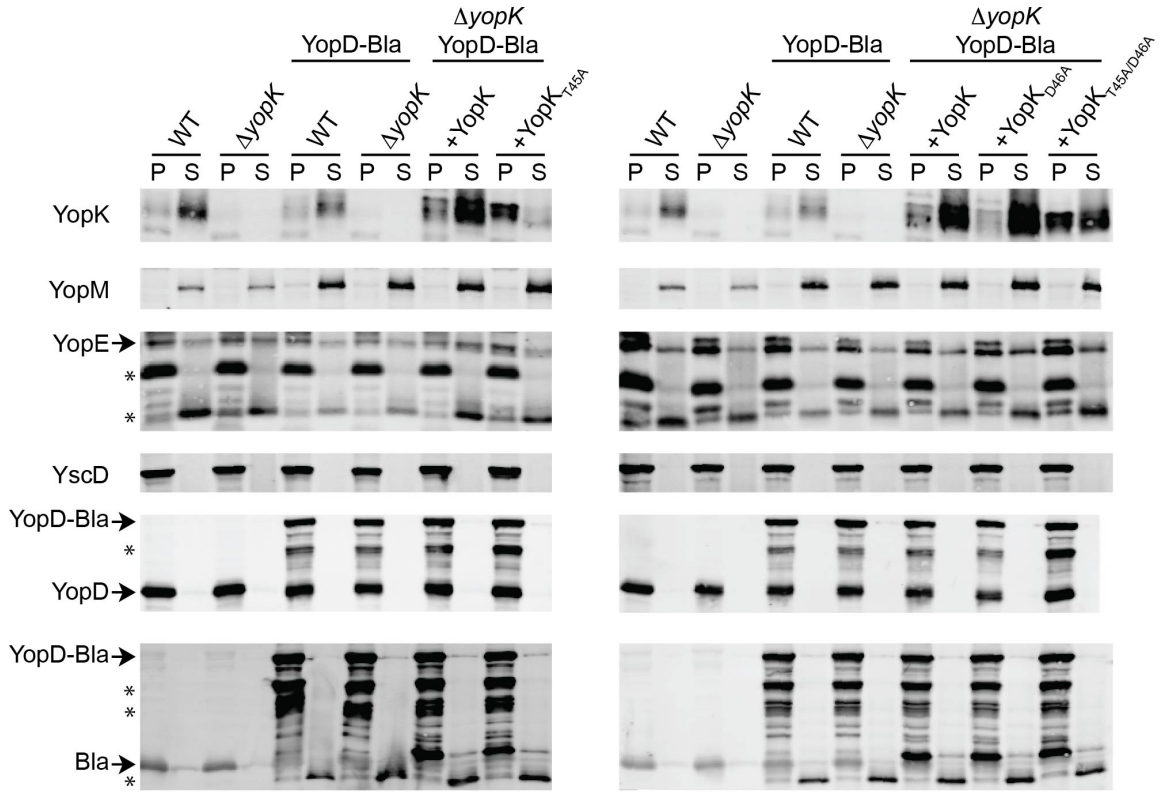

**Figure S4.**

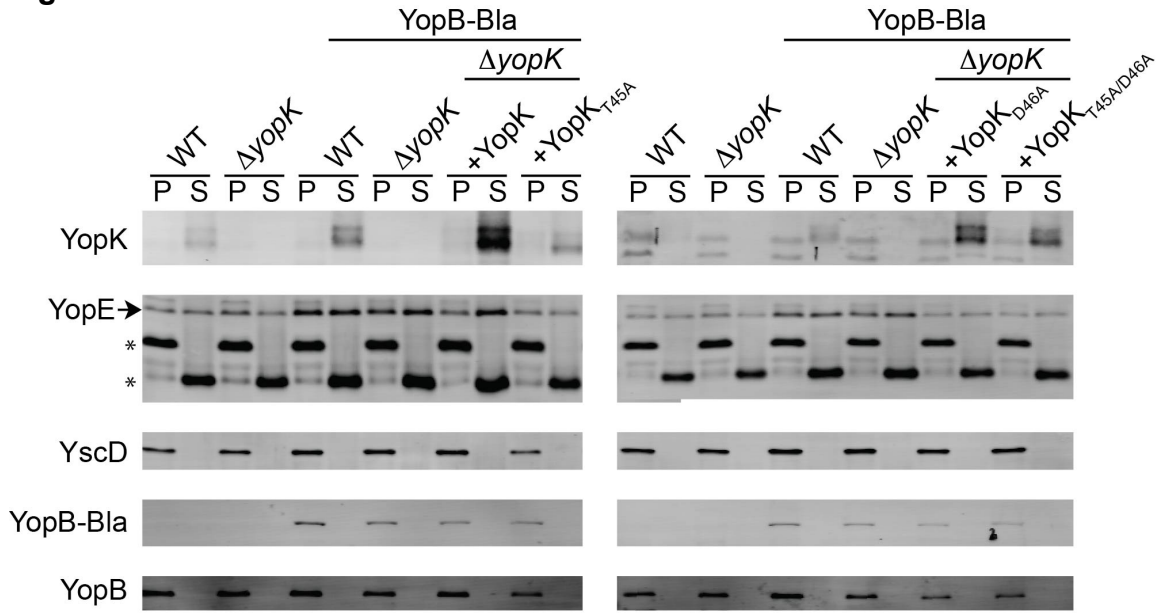

**Table S1. Plasmids used in this study.**

|                       |                                                                                         |                                  |
|-----------------------|-----------------------------------------------------------------------------------------|----------------------------------|
| pRD206                | <i>yopK</i> under native promoter on pUC19 backbone                                     | (Dewoody <i>et al.</i> , 2011)   |
| pRD12                 | pMM206 with T45A/D46A mutations to YopK                                                 | This work                        |
| pRD13                 | pMM206 with T45A mutation to YopK                                                       | This work                        |
| pRD15                 | pMM206 with D46A mutation to YopK                                                       | This work                        |
| pMM115                | YopB-Bla                                                                                | This work                        |
| pMM117                | YopD-Bla                                                                                | This work                        |
| pMM91                 | GST with C-terminal Bla fusion expressed from <i>yopM</i> promoter on pHSG576 backbone  | (Marketon <i>et al.</i> , 2005)  |
| pMM83                 | YopM with C-terminal Bla fusion expressed from <i>yopM</i> promoter on pHSG576 backbone | (Marketon <i>et al.</i> , 2005)  |
| pMM84                 | YopK-Bla with YopK promoter on pHSG576 backbone                                         | This work                        |
| pRD17                 | pMM84 with T45A/D46A mutations to YopK                                                  | This work                        |
| pRD22                 | pMM84 with T45A mutations to YopK                                                       | This work                        |
| pRD24                 | pMM84 with D46A mutations to YopK                                                       | This work                        |
| phmKeima-Red-MClinker | humanized monomeric Keima-Red fluorescent protein expression vector                     | MBL International Corp           |
| pRD1                  | <i>yopK</i> ORF inserted as a C-terminal fusion to <i>keima</i>                         | (Dewoody <i>et al.</i> , 2011)   |
| pUC19                 | Bacterial cloning vector, high copy number                                              | Fermentas Life Sciences          |
| pHSG576               | Low-copy-number bacterial expression vector                                             | (Takeshita <i>et al.</i> , 1987) |
| pRD16                 | pRD1 with T45A and D46A mutations                                                       | This work                        |
| pRD19                 | pRD1 with D46A mutation                                                                 | This work                        |
| pRD21                 | pRD1 with T45A mutation                                                                 | This work                        |
| pMM112                | YopJ-Bla fusion expressed from <i>yopN</i> promoter on pHSG576 backbone                 | (Dewoody <i>et al.</i> , 2011)   |
| YopJ-GSK              | YopJ <sub>1-288</sub> -GSK on the pBAD30 expression vector                              | (Garcia <i>et al.</i> , 2006)    |

**Table S2. Strains and cell lines used in this study.**

|                           |                                                                                                      |                        |
|---------------------------|------------------------------------------------------------------------------------------------------|------------------------|
| KIM5                      | Wild-type parent strain, attenuated <i>Y. pestis</i> mediaevalis strain lacking the <i>pgm</i> locus | (Brubaker, 1969)       |
| MEL27                     | $\Delta yopK$                                                                                        | (Dewoody et al., 2011) |
| MEL19                     | $\Delta yopE$                                                                                        | (Dewoody et al., 2011) |
| MEL2                      | $\Delta lcrQ$                                                                                        | (Sorg et al., 2005)    |
| DEW1                      | $\Delta yopEK$                                                                                       | (Dewoody et al., 2011) |
| PMY1                      | $\Delta yopE, \Delta lcrQ$                                                                           | This work              |
| PMY2                      | $\Delta yopEK, \Delta lcrQ$                                                                          | This work              |
| PMY3                      | $\Delta yopK, \Delta lcrQ$                                                                           | This work              |
| PMY4                      | $\Delta yopB$                                                                                        | This work              |
| MEL18                     | $\Delta yopN$                                                                                        | (Lee et al., 1998)     |
| PMY12                     | $\Delta yopD$                                                                                        | This work              |
|                           |                                                                                                      |                        |
| CMV- <i>bla</i><br>CHO-K1 | CHO cells constitutively expressing $\beta$ -lactamase                                               | Invitrogen             |
| CHO-K1                    | Chinese hamster ovary eukaryotic cell line                                                           | ATCC                   |

## Citations:

- Brubaker, R. R., (1969) Mutation rate to nonpigmentation in *Pasteurella pestis*. *J Bacteriol* **98**: 1404-1406.
- Dewoody, R., P. M. Merritt, A. S. Houppert & M. M. Marketon, (2011) YopK regulates the *Yersinia pestis* type III secretion system from within host cells. *Molecular Microbiology* **79**: 1445-1461.
- Garcia, J. T., F. Ferracci, M. W. Jackson, S. S. Joseph, I. Pattis, L. R. W. Plano, W. Fischer & G. V. Plano, (2006) Measurement of effector protein injection by type III and type IV secretion systems by using a 13-residue phosphorylatable glycogen synthase kinase tag. *Infect Immun* **74**: 5645-5657.
- Lee, V. T., D. M. Anderson & O. Schneewind, (1998) Targeting of *Yersinia* Yop proteins into the cytosol of HeLa cells: one-step translocation of YopE across bacterial and eukaryotic membranes is dependent on SycE chaperone. *Mol Microbiol* **28**: 593-601.
- Marketon, M. M., R. W. DePaolo, K. L. DeBord, B. Jabri & O. Schneewind, (2005) Plague bacteria target immune cells during infection. *Science* **309**: 1739-1741.
- Sorg, J. A., N. C. Miller, M. M. Marketon & O. Schneewind, (2005) Rejection of impassable substrates by *Yersinia* type III secretion machines. *Journal of Bacteriology* **187**: 7090-7102.



Takeshita, S., M. Sato, M. Toba, W. Masahashi & T. Hashimoto-Gotoh, (1987) High-copy-number and low-copy-number plasmid vectors for lacZ alpha-complementation and chloramphenicol- or kanamycin-resistance selection. *Gene* **61**: 63-74.
